# Supplementary material
Source: Copernicus journal article supplement (doi:10.5194/egusphere-2026-2171)
Supplement: Supplementary file [file egusphere-2026-2171-AC1-supplement.pdf]

1 Question 1:

2 I try to look quickly into cold-spells and also the heatwaves which you mention on Line  
3 20. Do you think the heatwaves lessen in area? It seem that in Fig. 2 of Gurumoorthi &  
4 Luis, 2026, your area is also one of not-hot areas in their study which is nicely consistent  
5 with your cold-spells.

6 Response:

7 This is a thoughtful suggestion. We agree that comparing our marine cold-spell results  
8 with marine heatwave behaviour provides a useful additional perspective. Using the  
9 same workflow but adjusted to the 95th percentile threshold and `coldspells=FALSE`  
10 argument in `heatwaveR`, we therefore checked marine heatwave cumulative-intensity  
11 trends (Fig. A) and yearly marine heatwave fields (Fig. B) for the same Adélie Sill-  
12 Commonwealth Bay domain.

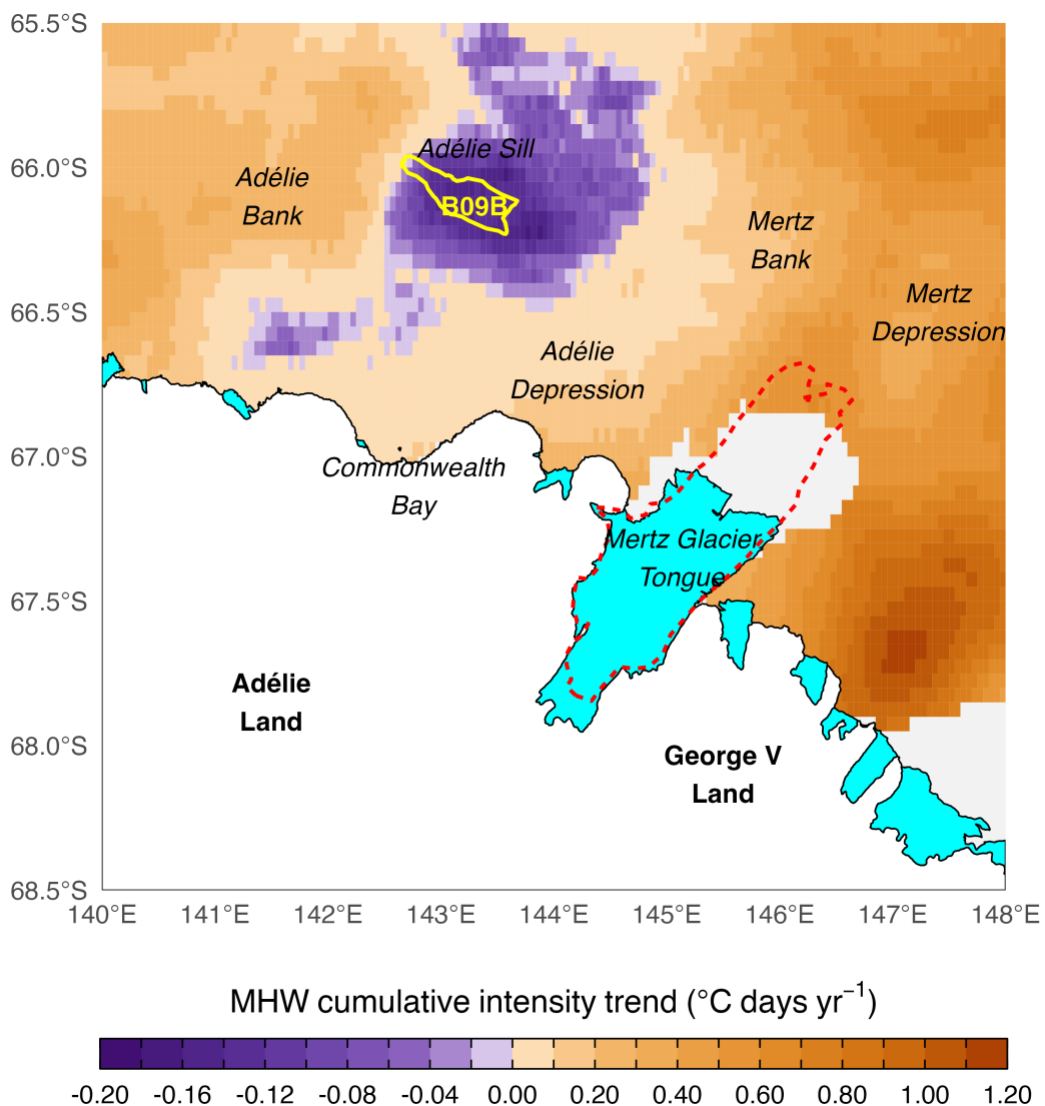

13

14 *Figure A. Marine heatwave cumulative-intensity trends in the Adélie Sill-Commonwealth Bay region. Spatial trend*  
15 *in annual marine heatwave cumulative intensity from 1982 to 2024, expressed as  $^{\circ}\text{C days yr}^{-1}$ . Purple colours*  
16 *indicate decreasing or weak marine heatwave cumulative intensity, while orange colours indicate increasing*  
17 *cumulative intensity.*

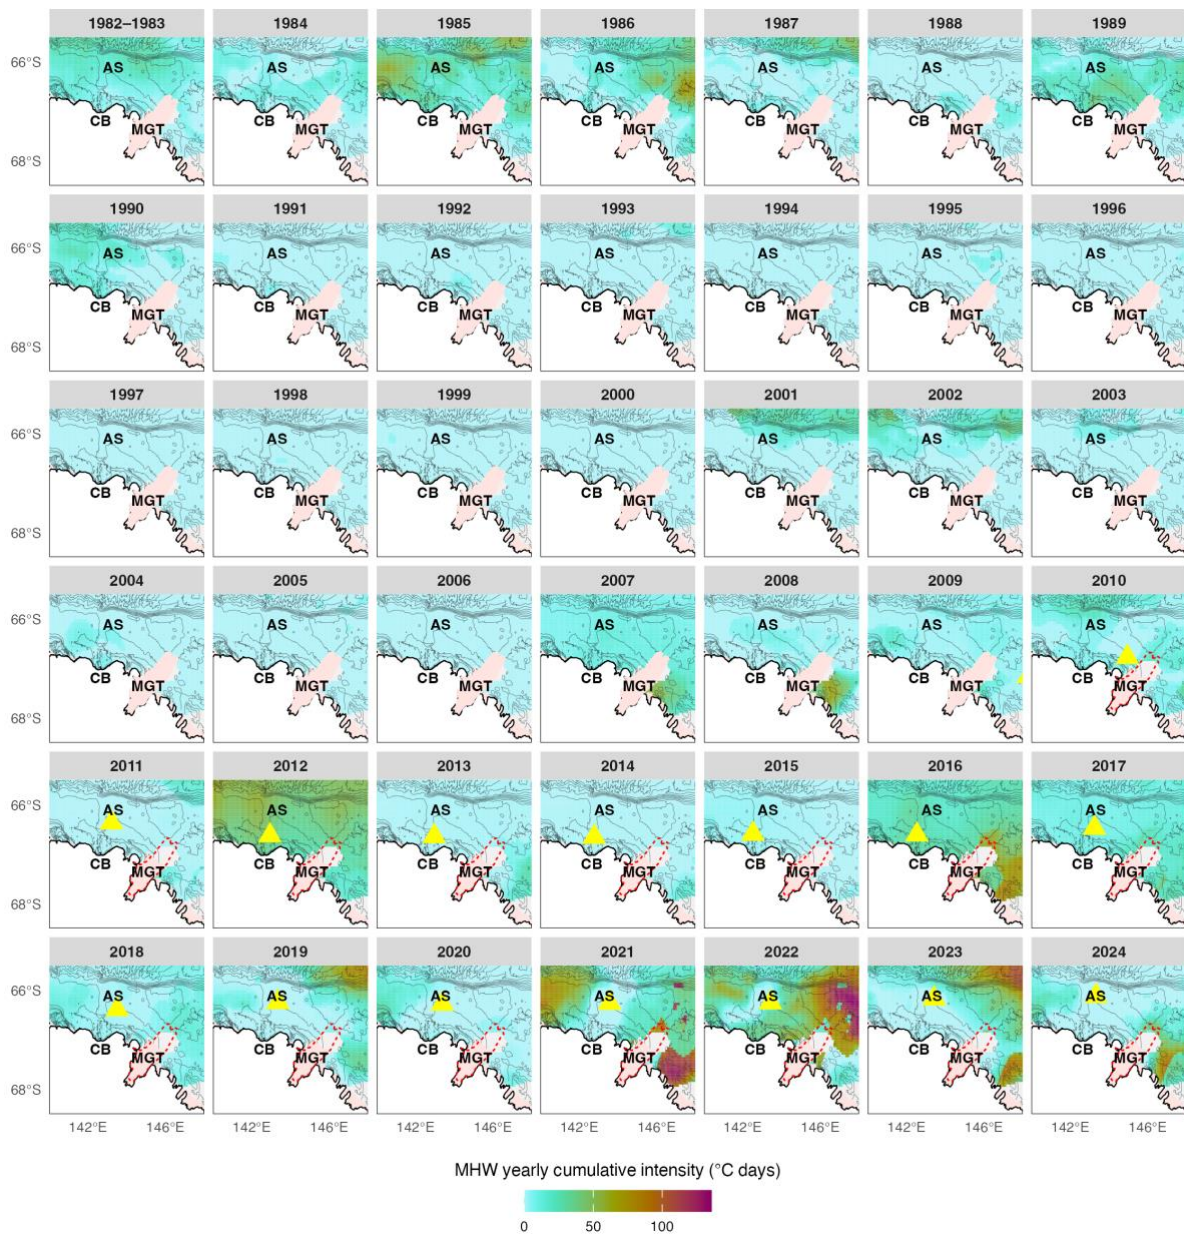

18

19 *Figure B. Yearly marine heatwave cumulative intensity in the Adélie Sill-Commonwealth Bay region from 1982 to*  
 20 *2024. Each panel shows annual cumulative marine heatwave intensity, expressed as °C days, using the same*  
 21 *study domain as the marine cold-spell analysis. The yellow triangles indicate yearly iceberg B09B positions, and*  
 22 *the dashed red outline shows the pre-calving Mertz Glacier Tongue extent. Marine heatwave activity occurs in*  
 23 *several years before and after B09B arrival, but the yearly pattern is less spatially locked to the Adélie Sill/B09B*  
 24 *sector than the marine cold-spell signal.*

25 The trend map (Fig. A) supports your observation, but with an important spatial nuance.  
 26 Across the full study box, marine heatwave cumulative intensity generally increased,  
 27 with a median trend of  $0.309 \text{ } ^\circ\text{C days yr}^{-1}$  and a mean trend of  $0.369 \text{ } ^\circ\text{C days yr}^{-1}$ .  
 28 However, the Adélie Sill/B09B core behaved differently: its median trend is slightly  
 29 negative ( $-0.024 \text{ } ^\circ\text{C days yr}^{-1}$ ), 61.6 % of pixels show negative trends, and 98.4 % show  
 30 either negative or very slow positive trends ( $\leq 0.1 \text{ } ^\circ\text{C days yr}^{-1}$ ). A Wilcoxon rank-sum test  
 31 also indicated that trends in the sill / B09B core were significantly lower than those in  
 32 the rest of the study box ( $p < 2.2 \times 10^{-16}$ ). We therefore agree that the B09B/sill sector is

33 not a strong marine heatwave hotspot, and this is broadly consistent with your  
34 observation from Gurumoorthi and Luis (2026) that this sector appears relatively “not-  
35 hot” compared with other Southern Ocean marine heatwave regions.

36 The yearly marine heatwave fields (Fig. B) add a useful overview. Marine heatwave  
37 activity increased after 2011 at the scale of the full study box, with mean annual  
38 cumulative intensity rising from 4.44 °C days before 2011 to 15.5 °C days after 2011,  
39 and the mean active-pixel fraction increasing from 37.2 % to 78.7 %. However, this  
40 increase was much weaker in the Adélie Sill / B09B core, where mean annual cumulative  
41 intensity increased only from 3.98 to 7.04 °C days, and the median annual intensity  
42 changed only slightly from 1.17 to 1.38 °C days. The top-year comparison also suggests  
43 that the marine heatwave signal is not as tightly linked to B09B as the marine cold-spell  
44 signal: in the full study box, 6 of the top 10 marine heatwave years occurred after 2011,  
45 but in the Adélie Sill / B09B core only 4 of the top 10 years were post-2011. The  
46 strongest core years include both post-B09B years, such as 2012 and 2016, and earlier  
47 years, such as 1985 and 1989. This suggests that marine heatwaves and marine cold-  
48 spells are not simple mirror images in this region. The cold-spell response appears  
49 more directly organized around the post-2011 sill and iceberg configuration, whereas  
50 marine heatwave activity is more spatially variable and less clearly tied to the grounding  
51 event.

52 We will check this comparison carefully and consider adding a short note in the Results  
53 and Discussion to place our marine cold-spell findings in the broader context of  
54 Southern Ocean marine heatwave patterns.

55 **Question 2:**

56 **Good that there is "3D" data for many variables in Line 125 in B-SOSE. I checked the**  
57 **linked and there was an archive of SOSE (not yet the B-SOSE now) for until back 2005.**  
58 **Do you think adding this is great for your Fig. 3 or the one now is sufficient?**

59 **Response:**

60 Thank you for checking the SOSE archive and for raising this useful point. We agree that  
61 extending the subsurface diagnostics farther back in time would be valuable. The SOSE  
62 archive from 2005 includes several relevant fields, including potential temperature,  
63 salinity, velocity components, surface freshwater and heat fluxes, sea-ice concentration,  
64 mixed-layer depth, and sea-ice effective thickness. However, it is not a direct one-to-one  
65 extension of the B-SOSE diagnostics used in Fig. 3, because some variables differ in  
66 temporal averaging, product structure, and availability relative to the 2008 onward B-  
67 SOSE iterations used here.

68 For the present manuscript, we focused on the B-SOSE iterations that directly cover the  
69 2010 Mertz Glacier Tongue calving and subsequent B09B grounding, since this  
70 transition period is central to our interpretation and provides internally consistent  
71 diagnostics for the post-calving state. We agree that the earlier SOSE output could be  
72 useful for an additional sensitivity test, especially for pre-2010 subsurface and sea-ice  
73 conditions, but we consider the current B-SOSE coverage sufficient for the main

74 objective of this study. We will clarify this limitation and future opportunity where  
75 appropriate.

76 **Question 3:**

77 Can you italics the penguin scientific name in Line 395 on next correction? I think it is  
78 better that way.

79 Response:

80 Thank you for catching that. We agree that the penguin scientific name should be  
81 italicized. It seems that the LaTeX formatting initially used for *Pygoscelis adeliae* did not  
82 carry through correctly in the R Markdown output. We will correct this in the next  
83 version.

84 **Question 4:**

85 Can you choose between the 2 Fischer on Line 470 on next correction? Maybe it was not  
86 taken when correcting, so it appears double now.

87 Response:

88 Thank you, you are exactly right. We were polishing the bibliography file before  
89 submission, and this duplicate Fischer reference was not fully cleaned up in the  
90 compiled version. Both entries refer to the same Scientific Reports paper, so we will  
91 keep only one Fischer et al. (2025) reference and make sure the in-text citation and  
92 reference list are consistent in the next version.
